# Supplementary material for: Research protocol: Cisplatin-associated ototoxicity amongst patients receiving cancer chemotherapy and the feasibility of an audiological monitoring program
Source: Springer Nature journal article supplement (doi:10.1186/s12905-017-0486-8), 2017-12-01
Supplement: MOESM3 [file 15296124]

**Cisplatin-associated ototoxicity amongst patients receiving cancer chemotherapy and the feasibility of an audiological monitoring program**

**INTERVIEW QUESTIONNAIRE FOR AUDIOLOGISTS**

Dear Audiologist

We are delighted that you have agreed to participate and would like to thank you sincerely, as the information from this study can be used to help us understand the complexities associated with chemotherapy. The information that you provide will be treated with the strictest of confidence and please do not hesitate to ask us any questions that you may have during the course of the study. Contact details are reflected on the information and consent document.

**INSTRUCTIONS**

1. Please mark the appropriate answer to each question with an X, and give further detail if necessary.
  
2. Please answer all questions.

1. How many years have you been practicing Audiology?

---

2. Describe your client base.

---

---

3. Are aware of drugs that may result in hearing loss?

 Yes No

3.1. If yes, list some of the classes of drugs that may lead to this problem.

---

---

4. Describe the auditory complaints that patients on chemotherapy may complain of.

---

---

5. Discuss your role as part of the team who deals with patients with cancer.

---

---

6. What do you think are the key elements of an ototoxicity monitoring program?

---

---

7. Do you see a role for Audiologists in the above program?

 Yes No

7.1. If yes, discuss your role.

---

---
