# Supplementary material for: Research protocol: Cisplatin-associated ototoxicity amongst patients receiving cancer chemotherapy and the feasibility of an audiological monitoring program
Source: Springer Nature journal article supplement (doi:10.1186/s12905-017-0486-8), 2017-12-01
Supplement: MOESM6 [file 15296124]

**DISCIPLINE OF AUDIOLOGY**  
**AUDIOLOGICAL EVALUATION RECORDING FORM**

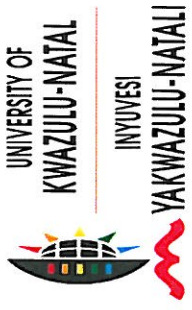

PARTICIPANT CODE: \_\_\_\_\_

TEST DATE: \_\_\_\_\_ TEST NO.: \_\_\_\_\_

TEST RELIABILITY: \_\_\_\_\_

PURE TONE AVERAGE: RIGHT \_\_\_\_\_ LEFT \_\_\_\_\_

**PURE TONE AUDIOMETRY**

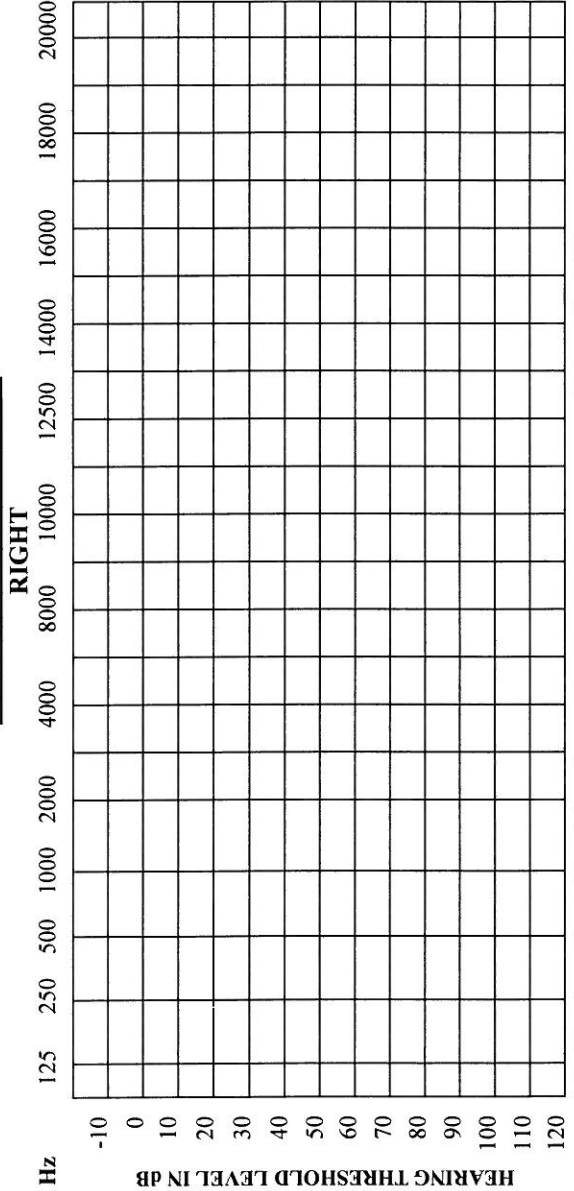

Type of masking: \_\_\_\_\_

**Masking Levels on Non-Test Ear.**

| Hz | 250 | 500 | 1k | 2k | 4k | 8k |
|----|-----|-----|----|----|----|----|
| AC |     |     |    |    |    |    |
| BC |     |     |    |    |    |    |

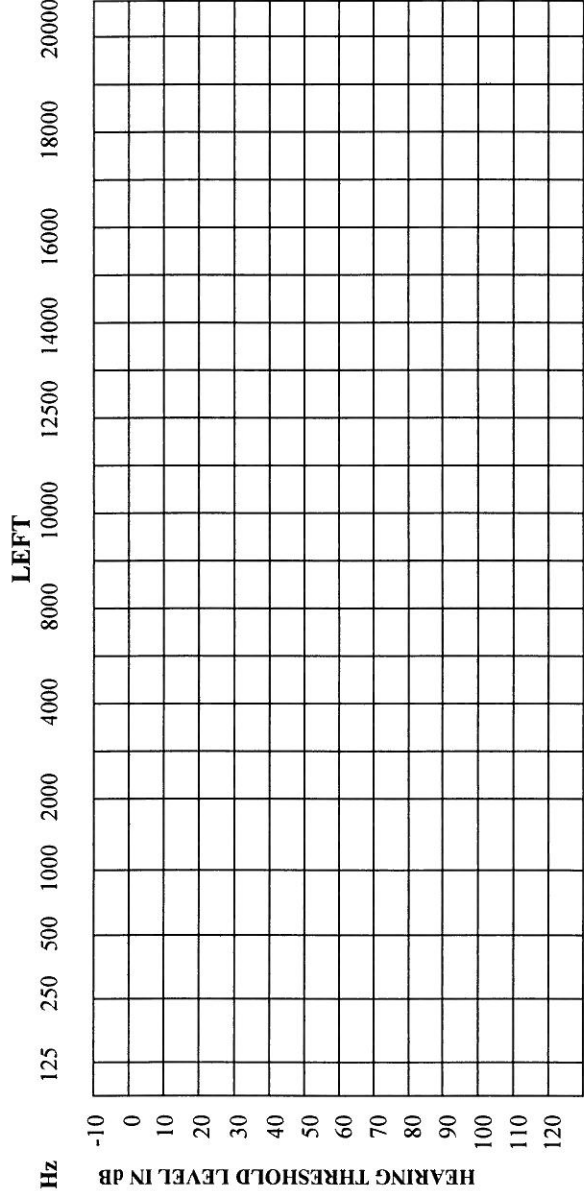

Type of masking: \_\_\_\_\_

**Masking Levels on Non-Test Ear.**

| Hz | 250 | 500 | 1k | 2k | 4k | 8k |
|----|-----|-----|----|----|----|----|
| AC |     |     |    |    |    |    |
| BC |     |     |    |    |    |    |

| STIMULUS                    | Left Blue | Right Red | Left Blue | Right Red |
|-----------------------------|-----------|-----------|-----------|-----------|
| Air Conduction<br>AC Masked | X □       | O △       | X □       | O △       |
| Bone Conduction             | >         | <         | >         | <         |
| B/C Masked                  | ] [       | ] [       | ] [       | ] [       |
| AR - Contra<br>AR - Ipsi    | - -       | - -       | ↗ ↘       | ↗ ↘       |

**SPEECH AUDIOMETRY**

**SPEECH RECOGNITION THRESHOLD**

| EAR   | SRT | MASKING |     |
|-------|-----|---------|-----|
|       |     | LEVEL   | EAR |
| RIGHT |     |         |     |
| LEFT  |     |         |     |

**SPEECH DISCRIMINATION SCORE**

| EAR   | dBHL | % | MASKING |     |
|-------|------|---|---------|-----|
|       |      |   | LEVEL   | EAR |
| RIGHT |      |   |         |     |
| LEFT  |      |   |         |     |

**P.I. FUNCTION**

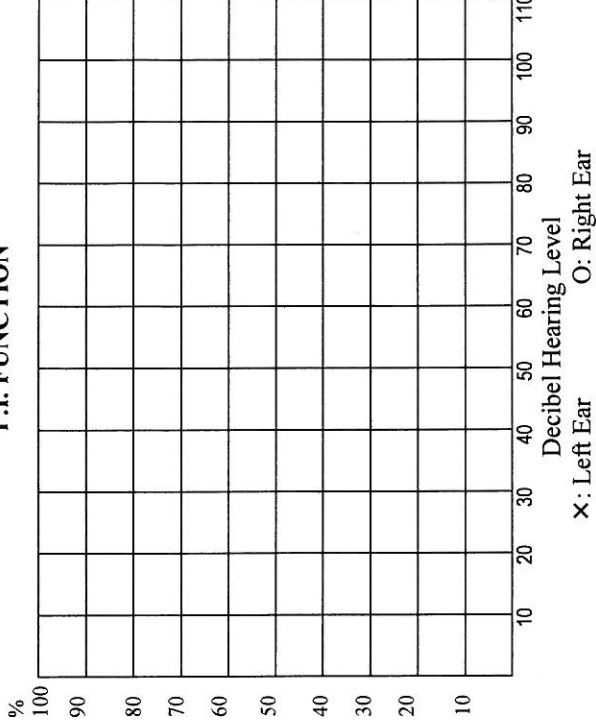

**IMMITTANCE AUDIOMETRY**

**Tympanometry**

| Right               | Left |
|---------------------|------|
|                     |      |
| Ear canal volume    |      |
| Middle ear pressure |      |
| Static compliance   |      |
| Type                |      |

**Acoustic Reflex Threshold Testing**

| Right | Frequency          |                      | Left |
|-------|--------------------|----------------------|------|
|       | Ipsilateral Reflex | Contralateral Reflex |      |
|       |                    |                      |      |
|       | 250Hz              |                      |      |
|       | 500Hz              |                      |      |
|       | 1000Hz             |                      |      |
|       | 2000Hz             |                      |      |
|       | 4000Hz             |                      |      |

**DISTORTION PRODUCT OTO-ACOUSTIC EMISSIONS**

| Right | GM   | Left |
|-------|------|------|
|       | 7253 |      |
|       | 5130 |      |
|       | 3616 |      |
|       | 2589 |      |
|       | 1818 |      |
|       | 1305 |      |
|       | 933  |      |
|       | 676  |      |

**OTOSCOPIC EXAMINATION**

| RIGHT EAR | OBSERVATION            | LEFT EAR |
|-----------|------------------------|----------|
|           | Outer Ear              |          |
|           | Ear canal              |          |
|           | Tympanic Membrane      |          |
|           | Surrounding Structures |          |
