# Supplementary material for: Research protocol: Cisplatin-associated ototoxicity amongst patients receiving cancer chemotherapy and the feasibility of an audiological monitoring program
Source: Springer Nature journal article supplement (doi:10.1186/s12905-017-0486-8), 2017-12-01
Supplement: MOESM9 [file 15296124]

**Cisplatin-associated ototoxicity amongst patients receiving cancer chemotherapy and the  
feasibility of an audiological monitoring program**

**QUESTIONNAIRE FOR PARTICIPANTS WITH CANCER POST MONITORING  
PROGRAM**

Dear Participant

We are delighted that you have agreed to participate and would like to thank you sincerely, for the information from this study can be used to help us understand the complexities associated with chemotherapy. The information that you provide will be treated with the strictest of confidence and please do not hesitate to ask us any questions that you may have during the course of the study. Contact details are reflected on the information and consent document.

**INSTRUCTIONS**

1. Please mark the appropriate answer to each question with an X, and give further detail if necessary.
  
2. Please answer all questions.

1. Did you receive information about the effects of the chemotherapy medication before commencing with treatment?

2. If so, who provided you with information?

3. Who referred you for the audiological monitoring?

4. Were the audiological evaluations conducted on the same day as your chemotherapy?

5. Do you feel that the duration of the audiological testing was too long?

6. Were the results of the audiological evaluations clearly explained to you?

7. Which of the following recommendations were made?

8. Did you follow-up on any of the above recommendations made?

9. Do you feel that the monitoring of your hearing during chemotherapy was beneficial?
