# Supplementary material for: Research protocol: Cisplatin-associated ototoxicity amongst patients receiving cancer chemotherapy and the feasibility of an audiological monitoring program
Source: Springer Nature journal article supplement (doi:10.1186/s12905-017-0486-8), 2017-12-01
Supplement: MOESM10 [file 15296124]

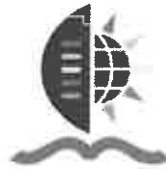

UNIVERSITY OF  
KWAZULU-NATAL

INYUVESI  
YAKWAZULU-NATALI

RESEARCH OFFICE  
BIOMEDICAL RESEARCH ETHICS ADMINISTRATION  
Westville Campus  
Govan Mbeki Building  
Private Bag X 54001  
Durban  
4000  
KwaZulu-Natal, SOUTH AFRICA  
Tel: 27 31 2604769 - Fax: 27 31 2604609  
Email: [BREC@ukzn.ac.za](mailto:BREC@ukzn.ac.za)

Website: <http://research.ukzn.ac.za/Research-Ethics/Biomedical-Research-Ethics.aspx>

07 July 2014

Ms. J Paken  
Department of Audiology  
School of Health Sciences  
University of KwaZulu-Natal

**PROTOCOL: Cisplatin-associated ototoxicity amongst patients with lung cancer and the feasibility of an audiological monitoring program at Grey's Hospital. REF: BE064/13.**

I wish to advise that your application for Amendments dated 19 June 2014 for the above study has been noted and approved by a sub-committee of the Biomedical Research Ethics Committee. The letter from School Academic leader dated 20 June 2014 supporting this request has been noted by BREC.

BREC has approved the change of title to the following:

**“Cisplatin-associated ototoxicity amongst patients receiving cancer chemotherapy and the feasibility of an audiological monitoring program at Grey's Hospital”**

The approval will be noted by a full Committee at a meeting to be held on 12 August 2014.

Yours sincerely

Ms A Marimuthu  
Senior Admin Officer: Biomedical Research Ethics
