# Supplementary material for: Research protocol: Cisplatin-associated ototoxicity amongst patients receiving cancer chemotherapy and the feasibility of an audiological monitoring program
Source: Springer Nature journal article supplement (doi:10.1186/s12905-017-0486-8), 2017-12-01
Supplement: MOESM11 [file 15296124]

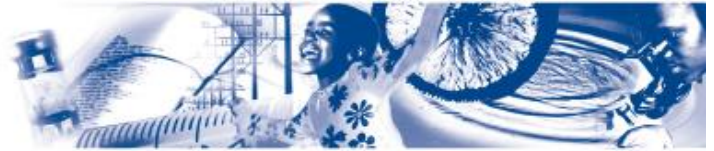

## RESEARCH CAPACITY DEVELOPMENT SUB DIRECTORATE

PO Box 19070, Tygerberg 7505, South Africa  
Francie van Zijl Drive, Parow Valley, Cape Town  
Tel +27 21 938 0911/938 0437, Fax +27 21 938 0377

23 February 2013

Dear Jessica Paken

It is my pleasure to inform you that your application for PhD funding: National Health Scholars Programme (NHSP) 2013 has been successful. We will be in touch with you for further detail regarding contract signing and other official processes. As advertised, the funding - soon be confirmed in a contract, will be commensurate with your current level of cost to company for your qualification(s).

Further and conclusive detail will appear in the forthcoming contract, currently being processed at MRC Legal. You will be able to accept or reject the offer then for us to proceed.

Congratulations again.

Regards.



**Dr T Maitin**

Division Manager: Research Capacity Development
