# Supplementary material for: Research protocol: Cisplatin-associated ototoxicity amongst patients receiving cancer chemotherapy and the feasibility of an audiological monitoring program
Source: Springer Nature journal article supplement (doi:10.1186/s12905-017-0486-8), 2017-12-01
Supplement: MOESM12 [file 15296124]

## INFORMATION DOCUMENT FOR CLINIC PERSONNEL

DISCIPLINE OF AUDIOLOGY  
SCHOOL OF HEALTH SCIENCES

Tel: 031 260 7438/8986

Fax: 031 260 7622

E-mail: [sitholep2@ukzn.ac.za](mailto:sitholep2@ukzn.ac.za)

E-mail: [naidoor1@ukzn.ac.za](mailto:naidoor1@ukzn.ac.za)

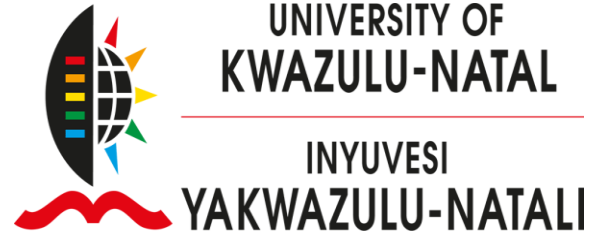

### Cisplatin-induced ototoxicity amongst patients with ovarian cancer and the feasibility of an audiological monitoring program at the Inkosi Albert Luthuli Central Hospital

To whom it may concern

I, Jessica Paken, under the supervision of Prof V. Sewram and Mr. C. D. Govender, am doing research on cancer chemotherapy and resultant hearing loss. In the study, I want to determine if patients on cancer chemotherapy develop a hearing loss.

Since you meet the criteria to be a participant in this study i.e., employed within the oncology unit for at least two months, I hereby invite you to participate in this study.

If you choose to participate in this study, you will be required to complete a questionnaire, which should take approximately 10 minutes to complete. Your participation will help increase the understanding of audiological related outcomes in patients on cancer chemotherapy.

This is a risk free procedure; therefore no harm would come to you. Your participation is voluntary and you can withdraw at any point. All information from the research will be kept strictly confidential. All results will be presented in the study with codes and numbers, with no reference to names and the data will be presented to research supervisors in a similar manner.

Should you have any further enquiries or concerns, you may contact me (Tel. No.: 031-2607548 or 084 2424 005 or e-mail: [pakenj@ukzn.ac.za](mailto:pakenj@ukzn.ac.za)) or the

BIOMEDICAL RESEARCH ETHICS ADMINISTRATION

University of KwaZulu-Natal

Research Office, Westville Campus

Govan Mbeki Building

Private Bag X 54001, Durban, 4000

KwaZulu-Natal, SOUTH AFRICA

Tel: 27 31 2604769 - Fax: 27 31 2604609

Email: [BREC@ukzn.ac.za](mailto:BREC@ukzn.ac.za).

Yours sincerely

---

Jessica Paken  
(Principal Investigator)

---

Prof V. Sewram  
(Research Supervisor)

---

Mr C. D. Govender  
(Research Co- supervisor)
